# Supplementary material for: Synthesis and properties of porous polymers synthesized by Michael addition reactions of multi-functional acrylate, diamine, and dithiol compounds
Source: Royal Society of Chemistry journal article supplement (doi:10.1039/c9ra09684a), 2019-12-23
Supplement: c9ra09684a1.pdf [file c9ra09684a1.pdf]

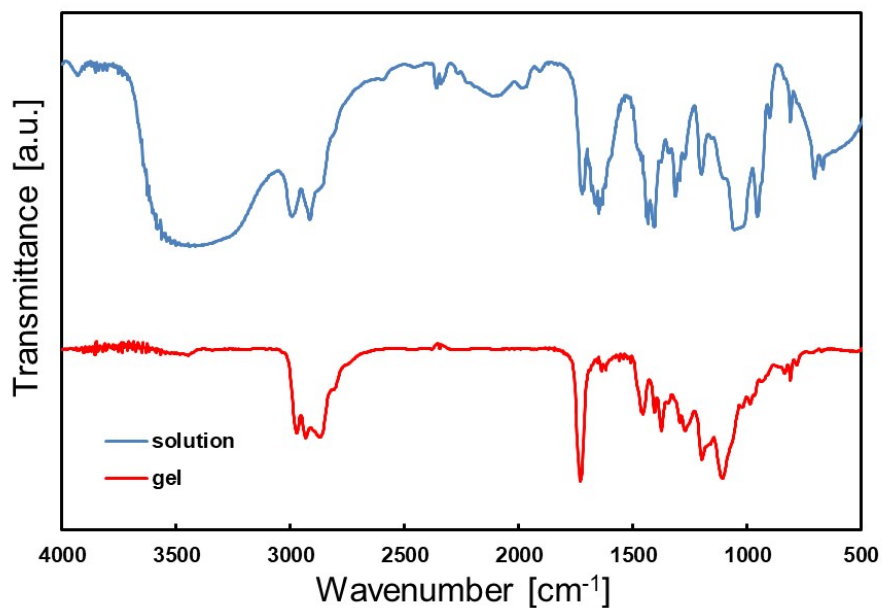

Figure S1 (a) FT-IR spectra of TPT-HDA system, before reaction (blue line), after reaction (red line), solvent: DMSO, monomer concentration: 20 wt%, reaction temperature: 60 °C.

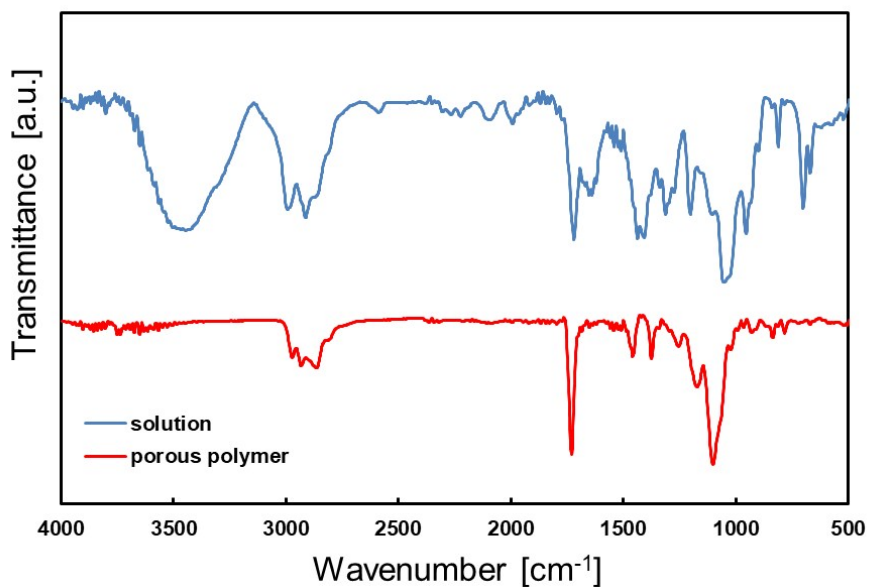

Figure S1 (b) FT-IR spectra of TPT-HDA system, before reaction (blue line), after reaction (red line), solvent: DMSO, monomer concentration: 25 wt%, reaction temperature: 45 °C.

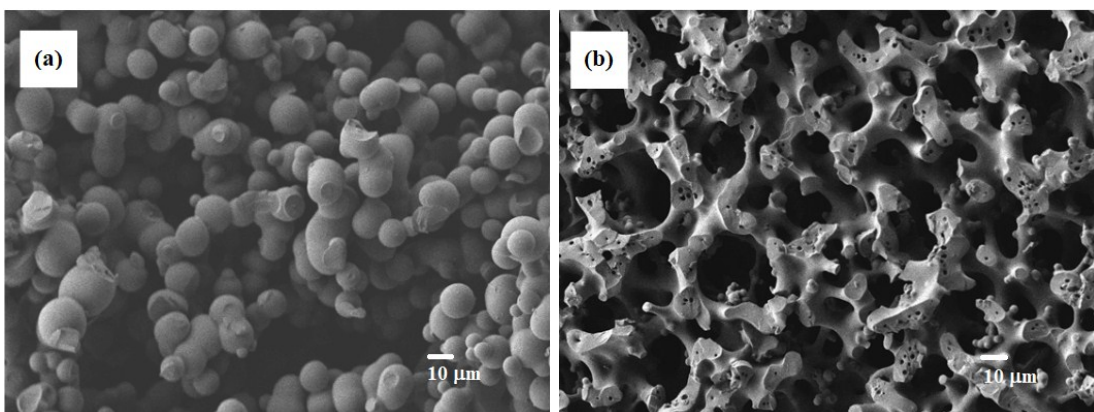

Figure S2 SEM images of TPT-HDA porous polymers used in compression test, monomer concentration in reaction solution: 25 wt%, reaction temperature: (a) 44 °C, and (b) 44.5 °C.

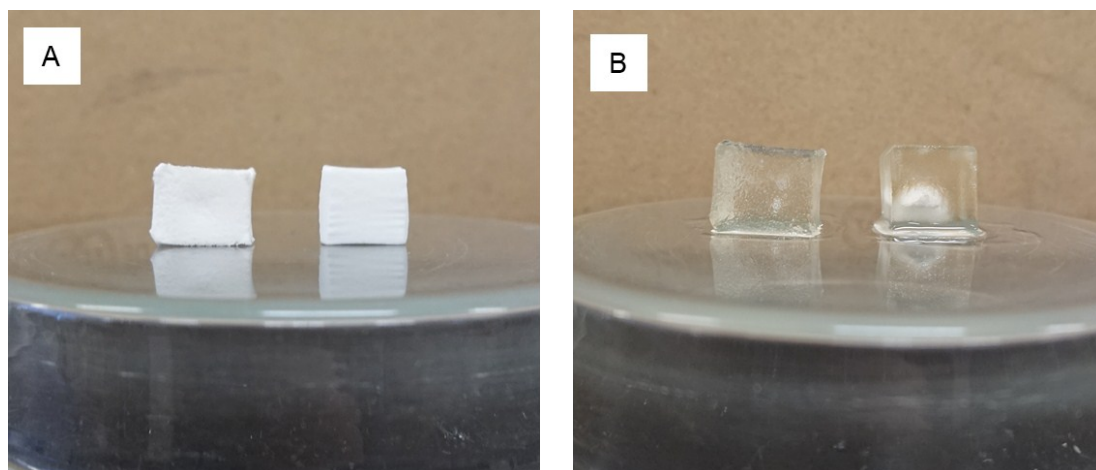

Figure S3 Photos of TPT-HDA porous polymers, (A) dried state, (B) dipped in DMSO,  $[TPT]/[HDA] = 4/3$  (mol/mol), solvent of reaction system: DMSO, monomer concentration in reaction solution: (left side in photo) 20 wt%, (right side) 25 wt%, reaction temperature: 45 °C, reaction time 48 h.

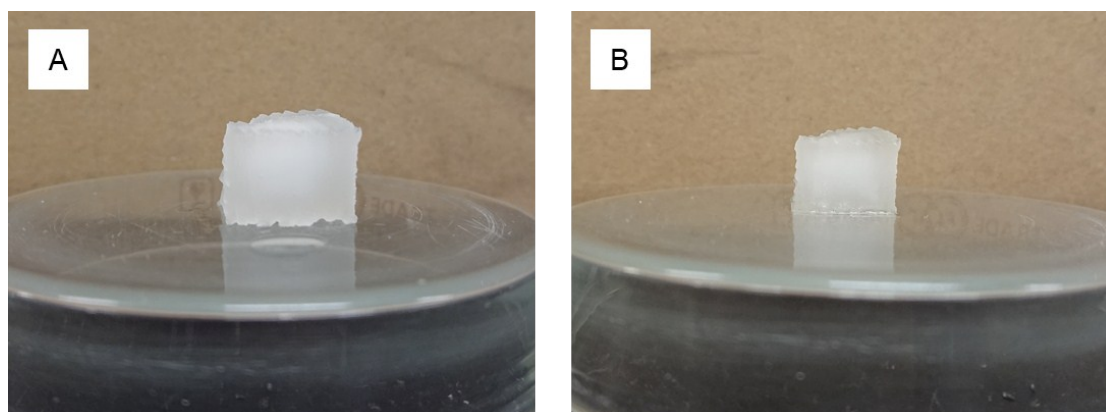

Figure S4 Photos of TPT-HDA porous polymer, (A) dipped in Chloroform, (B) dipped in DMF, [TPT]/[HDA] = 4/3 (mol/mol), solvent of reaction system: DMSO, monomer concentration in reaction solution: 20 wt%, reaction temperature: 45 °C, reaction time 48 h.

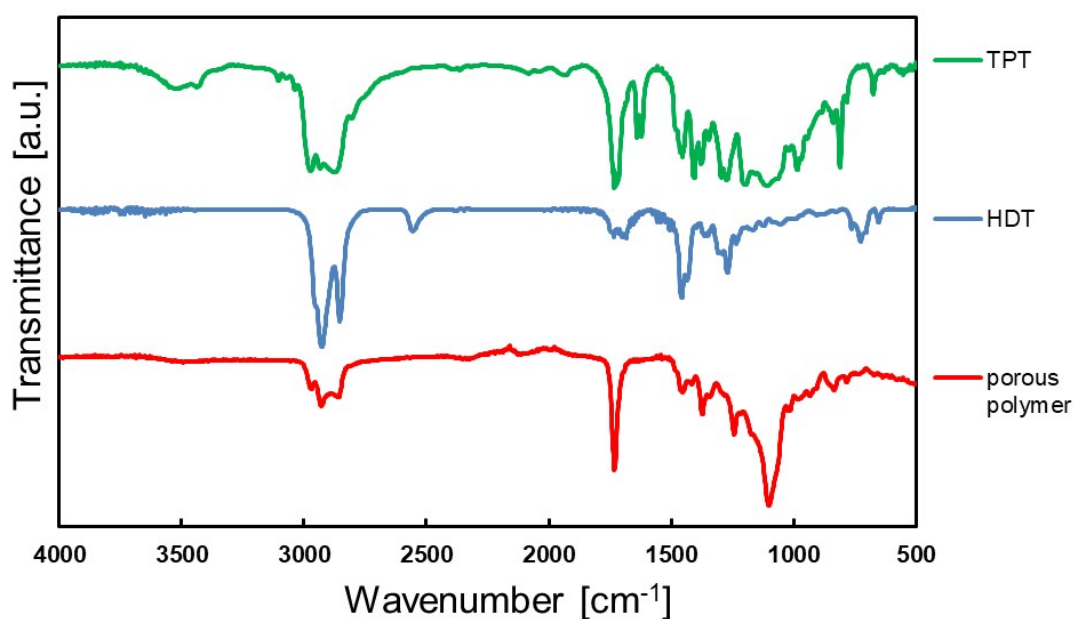

Figure S5 (a) FT-IR spectra of TPT, HDT and TPT-HDT porous polymer, solvent of reaction system: DMSO, monomer concentration in reaction solution: 25 wt%, catalyst concentration in reaction solution: [TEA] = 70.7  $\mu\text{mol/mL}$ , reaction temperature: r.t., reaction time: 48 h.

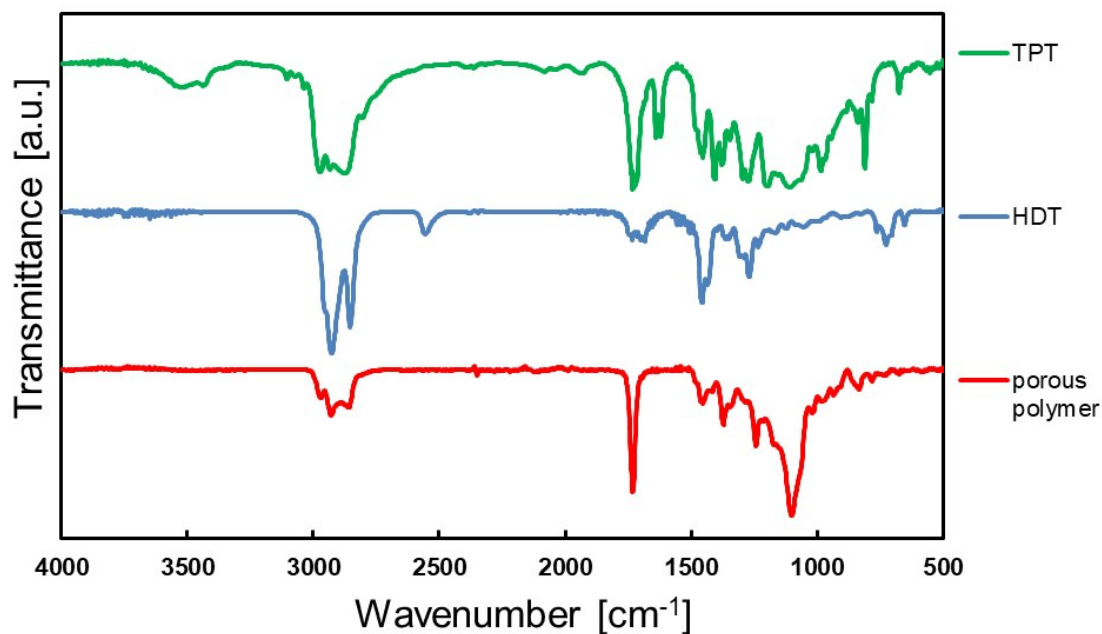

Figure S5 (b) FT-IR spectra of TPT, HDT and porous polymer, solvent of reaction system: DMSO, monomer concentration in reaction solution: 25 wt%, catalyst concentration in reaction solution: [Pip] = 3.33  $\mu\text{mol/mL}$ , reaction temperature: r.t., reaction time: 48 h.

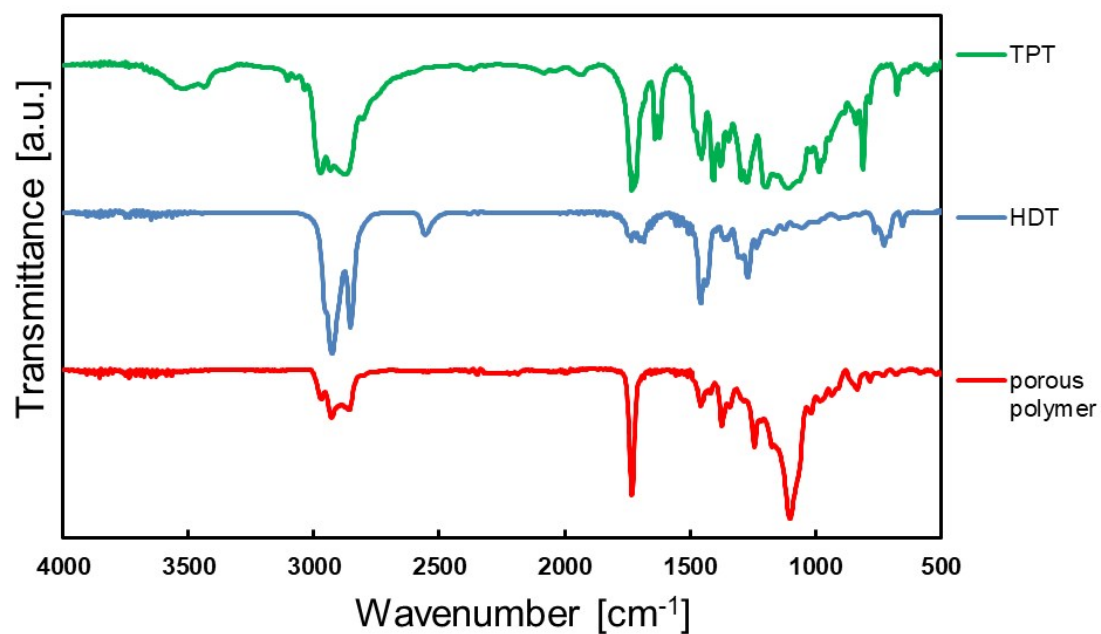

Figure S5 (c) FT-IR spectra of TPT, HDT and porous polymer, solvent of reaction system: DMSO, monomer concentration in reaction solution: 25 wt%, reaction temperature: r.t., catalyst concentration in reaction solution: [WPBG-027] = 1.42  $\mu\text{mol/mL}$ , reaction time: 48 h.

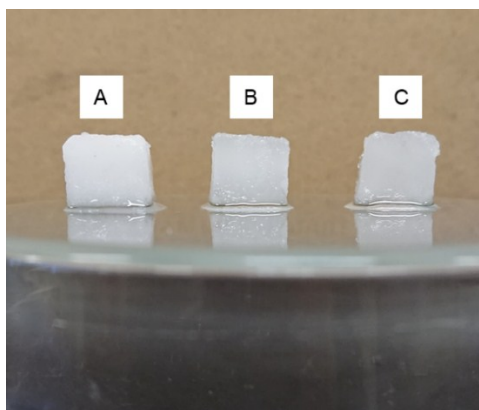

Figure S6 Photos of TPT-HDT porous polymers dipped in DMSO,  $[TPT]/[HDT] = 2/3$  (mol/mol), solvent to prepare: DMSO, monomer concentration in reaction solution: 25 wt%, catalyst concentration in reaction solution: (A)  $[TEA] = 70.7 \mu\text{mol/mL}$ , (B)  $[Pip] = 1.66 \mu\text{mol/mL}$ , (C)  $[WPBG-027] = 1.42 \mu\text{mol/mL}$ , reaction temperature: r.t., reaction time 48 h.
